# Supplementary material for: Spatio-temporal structure of Baltic free sea level oscillations in barotropic and baroclinic conditions from hydrodynamic modelling
Source: Copernicus journal article supplement (doi:10.5194/os-2020-110), 2020-12-03
Supplement: Supplementary file [file os-2020-110-AC1-supplement.pdf]

**We appreciate the Referee valuable remarks and recommendations and carefully addressed them in the new version of the manuscript. Our answers on the major comments can be found in the text bellow and full answers are given in the Supplement materials.**

**On behalf of all authors,**

**Elena Zakharova**

Referee 1 major comment

The description of the background and the research problem is professional. I would only recommend to (i) include reference to a generic overview of physical oceanography of the Baltic Sea (Leppäranta and Myrberg, 2009) already in the Introduction, (ii) mention an early but deep and still actual overview of the problem [Samuelsson, M., Stigebrandt, A. Main characteristics of the long-term sea level variability in the Baltic Sea. *Tellus A*, 48(5), 672-683, doi: 10.1034/j.1600-0870.1996.t01-4-00006.x, 1996], and (iii) discuss the results for the baroclinic calculations, if applicable, in the light of some recent advances towards better understanding of low-frequency baroclinic oscillations of the Baltic Sea [Kurkin, A. et al. Spatial distribution of energy of subinertial baroclinic motions in the Baltic Sea, *Frontiers in Earth Science*, 8, 184, doi: 10.3389/feart.2020.00184, 2020], with recommended focus on material on lines 398–407.

**Reply: Thank you. We included the references to the Leppäranta and Myrberg, (2009); and Samuelsson and Stigebrandt, (1996) overviews as recommended (see page1). However, Kurkin, et al,( 2020) does not investigate the water level variability in baroclinic waves, therefor the reference to this publication would not be fully correct.**

The hydrodynamic model INMOM is professional and up-to-date (although not much used as the input for international research publications). The idea is to spin up the system for a certain time interval under the impact of a strong atmospheric forcing, and then let the system run at its own, with the goal to detect the maximum number of self-oscillations over two years. To do so, the authors implement several simplifications that are not fully realistic but eventually help to detect various kinds of self-oscillations. In essence, the system of detected oscillations should be invariant with respect to the initial disturbance; however, this feature should be at least shortly discussed (and at best with some supporting evidence from other parts of the World).

**Reply: 1. Thank you for this feedback. We agree with the Reviewer that in our definition of task, simulated free sea level oscillations should be invariant relative to initial perturbation. Moreover, the agreement of our results with the results of cited publications proves this statement. In spite of difference of forcing conditions used in different studies, the resulting spectra of free barotropic oscillations are quite similar. Unfortunately, we have not found publications for other World, where the baroclinic modes of free oscillations were investigated using numerical experiments based on hydrodynamic model and were not able to discuss this question.**

Also, in this context it would be important to explain why in both the barotropic and baroclinic implementations, the Baltic Sea was considered a fully enclosed basin, with no water exchange with the North Sea as stated on lines 175–177. It is also important to comment shortly on possible differences with runs that would resolve water exchange between the North and Baltic Sea. Also, it remains unclear whether river water input and ice conditions were also neglected in both the barotropic and baroclinic implementations (line 177).

**Reply: We introduce requested details to clarify this remark (see section 2.3).**

- 1."This assumption aimed to exclude the effect of external barotropic and baroclinic oscillations coming from the North Sea".
- 2."River water input and ice conditions were also neglected in both numerical experiments."

On lines 182–183 it is said that “Setting the turbulent viscosity to zero for the vertical components and to the minimum values for the horizontal components allows the damping of the simulated sea level fluctuations to be reduced.” Please comment whether you did so and, if yes, how the modelled spectra relate to the actual spectra of motions. Again, I guess, the results are qualitatively invariant with respect to the particular set of settings, and stronger damping would simply render some self-oscillation patterns undetectable.

**Reply. We agree with the remark and edited the text for better reading:**

**"In order to be able to characterize the free oscillations with better spectral resolution and in larger spectral range, the sea level dumping factors have to be reduced. In both numerical experiments, the dumping effect was reduced due to 1) setting the coefficients of vertical turbulent viscosity and of bottom friction to zero and 2) setting the coefficient of horizontal turbulent viscosity to the minimum values."**

Minor aspects to adjust:

Line 29: “may resonate” would be more exact.

**The phrase was changed according to Reviewer suggestion on "may resonate"**

Lines 30–31: The source “Kulikov and Medvedev, 2013” addresses generic spectrum of water level in the Baltic Sea and seems inappropriate in the context of this particular claim.

**Thank you for catching this error. The reference was removed from this phrase.**

Lines 37–39: For the benefit of readers I recommend to include also a reference to (Leppäranta and Myrberg, 2009). The provided references are correct but they are not easily accessible today, and some of them are written in German or Russian.

**The reference was added**

Line 41: “a 39 h period”.

**Thank you, the text is edited**

Line 42: must be “Neumann”.

**Thank you, the text is edited**

Line 60 and elsewhere: I recommend using “Baltic proper” as this is not a proper name.

**The text was edited according to this suggestion.**

Lines 87–88: it is recommended to say already here that the model uses sigma coordinates in vertical.

**In our text the sigma is defined already in the second sentence dedicated to the model description. " A dimensionless value  $\sigma$  is used as the vertical coordinate...". If the comment has another meaning, sorry, we did not catch it.**

Line 104: better say “with a spatial resolution of 2 nautical miles” or similar, and indicate the resolution also in kilometers (cf. line 115).

**Thank you for suggestion, the text was edited**

Line 113: capitalize: “HIROMB”.

**The text was edited**

Lines 116, 187: capitalize: “ERA”.

**The text was edited**

Lines 133–134: remove repeating information “and includes the station coordinates, sea level measurement frequency, number of sea level measurements used in this study, and percentage of missing data” that is found in the table caption.

**The sentences were edited as recommended.**

Line 138, Table 1: (i) remove the column “Period” and mention this interval in the caption; (ii) use “measurement interval/frequency” or similar instead of “span”.

**The corrections were introduced**

Line 143: better say “standard statistical parameters”.

**The correction was introduced**

Line 144: define SSH for the reader.

**The correction was introduced**

Line 144: obviously “ratio” is meant for  $\sigma_p$ .

**The correction was introduced**

Line 145: the additional criteria of accuracy  $P_m$  is not defined but still used below (e.g., on line 166).

**The definition of  $P_m$  was given in the next sentence, but, indeed, was poorly worded. The text was rewritten : "The  $P_m$  parameter allows the assessment of the number of good simulations considering their accuracy  $< 0.674\sigma_{tg}$ . "**

Lines 146–157: please punctuate the text in formulas as part of the sentences.

**The commas were added.**

Lines 152–154: I don’t think it makes sense to show the basic formulas (3)–(5) in a research paper of this type.

**According to recommendations equations (3-5) were deleted.**

Line 166: please check the format the expression “ $P_m < 0.674\sigma_{tg}$ ”.

**Thank you for catching this error. The correction was introduced**

Line 171: “again” is redundant.

**The word "again" was removed.**

Line 175: should be “exchange”.

**The correction was introduced**

Line 199: the expression “ $k=0,1,2, \dots$ ” should be removed as the role of  $k$  becomes evident from the expression for  $f(t)$ ; also, the definition of angular frequency would be better placed in line with the rest of the text.

**The corrections were introduced**

Line 201: please check the format  $a_k$ .

**The correction was introduced**

Line 202: “mean average” and “coefficient number” sound strange.

**The correction was introduced**

Line 203: please check the format  $F_k$  and  $A_k$ .

**The correction was introduced**

Line 203: should be Equation (8).

**The correction was introduced**

Lines 207, 211: why period is now P? Does it have a specific meaning?

**The correction was introduced: P was changed for T in the text and corresponding equations.**

Lines 208–214: please punctuate the text in formulas as part of the sentences and check the format of variables in the text.

**The corrections were introduced**

Line 220: the words “are low and” are redundant.

**The correction was introduced: the words were deleted.**

Line 222: “principally” is redundant.

**The word was deleted.**

Line 229: The standard deviation appears now as ( $\sigma$ ); please redefine or unify with the usage above.

**The correction was introduced.**

Line 232, 234: please show “Hailuoto Island, Ulvö Deep” etc. on some map.

**The island and the Deep are shown now on the fig.1 map.**

Line 310: should be “Leppäranta and Myrberg, 2009).”

**The correction was introduced.**

Line 311–312: include the classic expression for the long wave speed into the text. There is no need for a displayed equation.

**The Equation (13) was moved into the text. " Under these conditions, the theoretical phase speed of the barotropic gravity wave in the Baltic Sea, calculated using expression**

$C_g = \sqrt{gH}$  (where  $H$  is the depth and  $g$  is the acceleration due to gravity), ranges between 12 and 67 m s<sup>-1</sup>. "

Line 322: probably “phenomena” or similar are meant (instead of “observations).

**Thank you for catching this error. The "observations" was changed for "phenomena".**

Line 336: show Narva Bay and Ellesmere Island on some map.

**The Narva Bay is now shown on the map. The Ellesmere Island has to be Öland Island. Necessary correction was made.**

Line 349: “the pycnocline”.

**The correction was introduced.**

Line 350: say “barotropic oscillations”.

**The correction was introduced.**

Line 351: simply “broaden”.

**The correction was introduced.**

Line 360: show Vyborg Bay on some map.

The Vyborg Bay is now shown on the Fig1.

Line 378: include the classic expression for the long wave speed into the text also here. There is no need for a displayed equation.

**The correction was introduced.**

Line 380, Figure 13: say “Number of cases” in the legend (2×).

**The correction was introduced.**

Lines 386–387: say simply “we estimated the phase speed . . .”.

**The phrase was simplified according to recommendations.**

Line 413, Figure 15: say “Number of cases” in the legend (2×).

**The correction was introduced.**

Line 416: remove “estimated by (Eq. 13)”.

**The correction was introduced.**

Line 423, the expression “the maximum dispersion of free oscillations occurs” seems to contain too much cryptic jargon. Consider saying: “the most intense free oscillations occur” or similar.

**The correction was introduced. " In barotropic conditions, the most intense free oscillations occur on a time scale of...."**

Line 429: consider replacing “moves to” by “is located in”.

**The correction was introduced.**

Line 436, 474, 475: it is recommended to use the long expression instead of PSW and GW in this sort of discussion as some readers may omit the body part of the paper.

**In the discussion section the PSW and GW abbreviations were replaced for long expressions.**

Line 445: use “the local”.

**The correction was introduced.**

Line 464: should be (Nekrasov, 1975).

**The correction was introduced.**

Line 504: (Fischer and Matthaus, 1996; Matthaus, 2006) missing from the reference list; also, should be : (Fischer and Matthäus, 1996; Matthäus, 2006).

**The references were added and corrections were introduced.**

Lines 521–522: please put the claim into more clear connection with the properties of barotropic oscillations.

**The phrase was rewritten. " The primary difference between the results of the experiments consists in the generation of sea level baroclinic oscillations of seasonal scales with periods of 89 and 358 days in stratified sea".**

Line 523: consider replacing “at the top” by some other expression.

**Replaced for "in the eastern part of the Gulf of Finland"**

Line 532: “may represent” seems to be more accurate.

**The correction was introduced.**

References: (i) most doi indices are missing; please amend; (ii) the style of most references does not follow the Ocean Science style.

**The reference list and format was edited with the Mendeley to match with the Copernicus publishing format.**

Line 606: should be “Longuet-“.

**The correction was introduced.**

Line 608: the title should be capitalized according to German style: “Spektren der Wasserstandsschwankungen der Ostsee im Jahre 1958”.

**The correction was introduced.**

Line 618: should be “Suursaar”.

**The reference on this article does not exist in body text and erroneously appears in the Reference list. The correction was made.**

Line 632: delete most of the reference and leave only: “Wilson B. W. Seiches. Advances in Hydroscience, 8, 1–89, 1972.”

**The correction was introduced.**
